# Supplementary material
Source: publisher figshare collection journal article supplement (https://wiley.figshare.com/articles/dataset/_/3528404)
Supplement: Supplementary file 2 [file 1 › appendix-C.htm]

Ecological Archives E088-168-A3


### *Ecological Archives* E088-168-A3

### **Priyanga Amarasekare. 2007. Trade-offs, temporal variation, and species coexistence in communities with intraguild predation. *Ecology* 88:2720–2728.**

Appendix C. Analysis
of an unstructured model of the two-parasitoid–single-host interaction. Click here for a PDF file of the appendix.

---

  

[Back to E088-168]
